# Supplementary material for: Prebiotic Inulin Supplementation and Peripheral Insulin Sensitivity in adults at Elevated Risk for Type 2 Diabetes: A Pilot Randomized Controlled Trial
Source: MDPI journal article supplement (doi:10.3390/nu13093235), 2021-09-17
Supplement: s1 [file s1]

## Supplemental Tables and Figures

Table S1. Controlled Diet Composition.

| Variable             | Standardized Composition |
|----------------------|--------------------------|
| <b>Carbohydrate</b>  | 55% kcals                |
| <b>Protein</b>       | 15% kcals                |
| <b>Total Fat</b>     | 30% kcals                |
| <b>Saturated Fat</b> | 8% kcals                 |
| <b>Fiber</b>         | <8g / 1000 kcals         |
| <b>Sodium</b>        | <3,000 mg/day            |

All variables were standardized across calorie levels.

Table S2. Habitual physical activity.

| Variable                      | Placebo (n=9) |          | Inulin (n=13) |          |
|-------------------------------|---------------|----------|---------------|----------|
|                               | Baseline      | Week 6   | Baseline      | Week 6   |
| <b>Sedentary time (min/d)</b> | 534 ± 42      | 422 ± 31 | 586 ± 39      | 563 ± 33 |
| <b>Light PA (min/d)</b>       | 304 ± 34      | 205 ± 25 | 242 ± 38      | 248 ± 19 |
| <b>Moderate PA (min/d)</b>    | 36 ± 10       | 3 ± 11   | 28 ± 8        | 21 ± 5   |
| <b>Vigorous PA (min/d)</b>    | 3 ± 3         | 0 ± 1    | 0 ± 0         | 1 ± 1    |

Data are mean ± SEM. There were no changes in any of the PA variables with intervention in the placebo and inulin groups (all p>0.05). Abbreviations used: PA = physical activity.

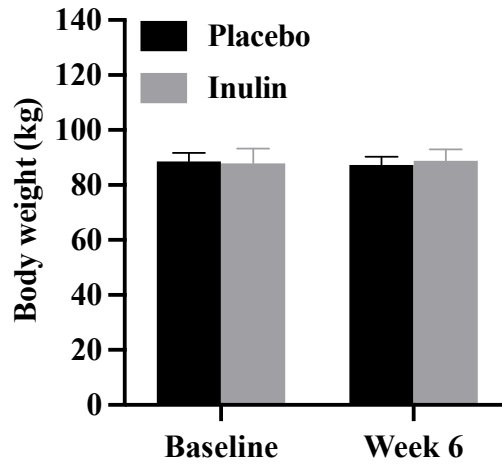

**Figure S1.** Data are mean $\pm$ SEM. There were no differences in body weight with the intervention in the placebo or inulin groups (all  $p>0.05$ )

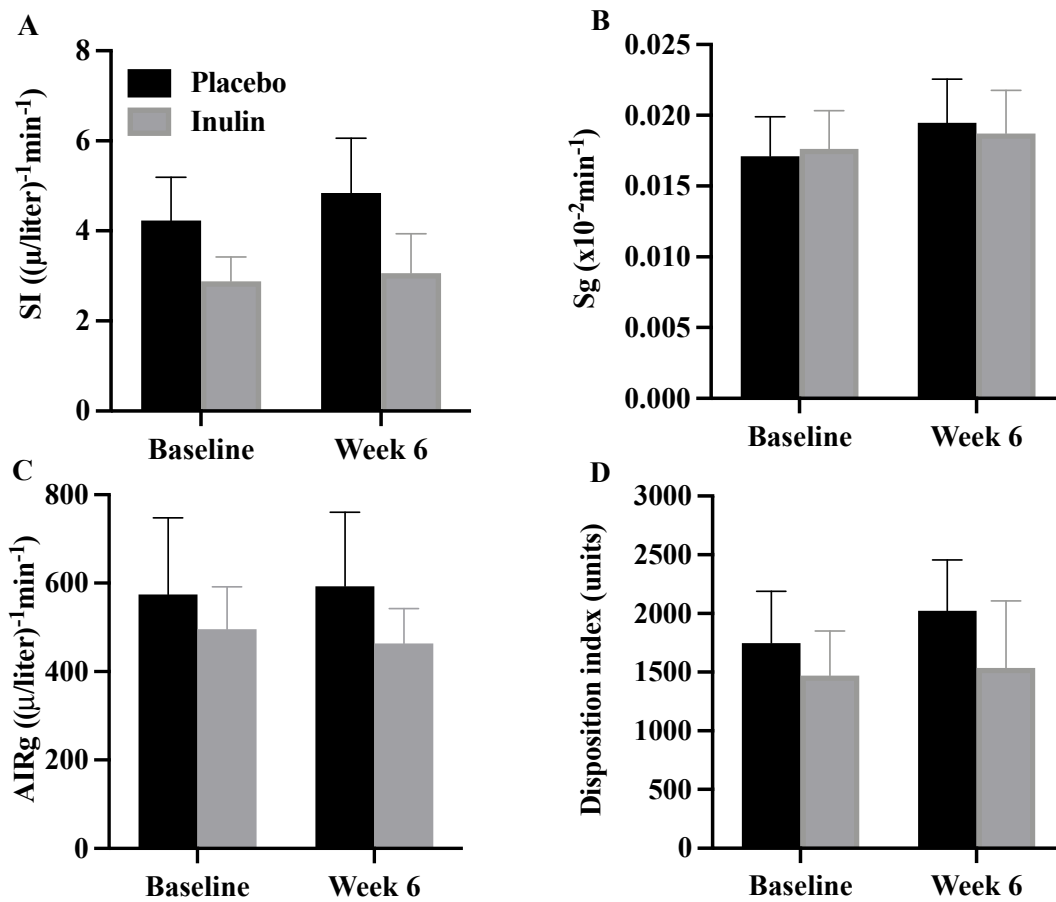

**Figure S2.** Data are mean $\pm$  SEM. There were no changes in any of the IVGTT-related variables with the intervention in the placebo or inulin groups (all  $p>0.05$ ). A, SI=insulin sensitivity; B, Sg=glucose effectiveness; C, AIRg=acute insulin response to glucose; D, Disposition index.
